# Supplementary material
Source: PubMed Central journal article supplement (PMC5922443)
Supplement: NIHMS957670-supplement-ESI_1.pdf [file NIHMS957670-supplement-ESI_1.pdf]

**Electronic Supplementary Information for:**

**Impact of Primer-Dimers and Self-Amplifying Hairpins on Reverse Transcription Loop-Mediated Isothermal Amplification Detection of Viral RNA**

Robert J. Meagher<sup>1</sup> \*, Aashish Priye<sup>1</sup>, Yooli K. Light<sup>2</sup> Cheng Huang<sup>3</sup>, Eryu Wang<sup>4</sup>

1 = Sandia National Laboratories, Biotechnology and Bioengineering Department, PO Box 969, Livermore, CA 94550, USA

2 = Sandia National Laboratories, Systems Biology Department, PO Box 969, Livermore, CA 94550, USA

3 = University of Texas Medical Branch, Department of Pathology, 301 University Blvd, Galveston, TX 77555, USA

4 = University of Texas Medical Branch, Department of Microbiology and Immunology, 301 University Blvd, Galveston, TX 77555, USA

\* Corresponding author: [rmeaghe@sandia.gov](mailto:rmeaghe@sandia.gov); +1 925 294 6847

| <b>Contents</b>                                                                                                                                                                                           | <b>Page</b> |
|-----------------------------------------------------------------------------------------------------------------------------------------------------------------------------------------------------------|-------------|
| <b>Supplementary Table S1:</b> Complete set of primers for modified YFV assay, with adaptation for QUASR.                                                                                                 | 3           |
| <b>Supplementary Table S2:</b> Complete set of primers for modified DENV assay.                                                                                                                           | 4           |
| <b>Supplementary Table S3:</b> Thermodynamic parameters for original and modified YFV, DENV2 and DENV4 FIP primers.                                                                                       | 5           |
| <b>Supplementary Table S4:</b> Comparison of performance for DENV primers (pan-serotype assay) either using originally reported primer sequences or a combined set using the modified DENV2 and DENV4 FIP | 5           |
| <b>Supplementary Table S5:</b> Limits of detections with 50% and 90% probability, and corresponding confidence intervals for assay targets from the modified YFV and DENV assays.                         | 6           |
| <b>Supplementary Figure S1:</b> YFV sequence alignment of a portion of the NS1 gene showing primer binding sites, including original and modified (bumped) F2 region of FIP.                              | 7           |

|                                                                                                                                                                                |    |
|--------------------------------------------------------------------------------------------------------------------------------------------------------------------------------|----|
| <b>Supplementary Figure S2:</b> DENV-2 sequence alignment of 3'-UTR region showing primer binding sites, including original and modified (bumped) F2 region of FIP.            | 8  |
| <b>Supplementary Figure S3:</b> Real-time amplification curves and probability of non-specific amplification, for 4 candidate primer sets evaluated for an Ebola RT-LAMP assay | 9  |
| <b>References</b> for supplementary information (all are also cited in the main text, but with different numbering)                                                            | 10 |

In addition, we have provided an additional supplementary file containing MATLAB and C source files that can be used for calculating  $\Delta G'$ (NSA). Documentation is included within the code file.

**Supplementary Table S1** Complete set of primers for modified YFV assay, with adaptation for QUASR. Underlined sequences within the FIP and BIP primers reflect the F1c and B1c regions of those primers. IBFQ = Iowa Black FQ quencher. The primers are based upon the publication by Kwallah *et al.* <sup>1</sup>

| Primer name     | Sequence                                               | Concentration (nM) |
|-----------------|--------------------------------------------------------|--------------------|
| YFV F3          | TCCACACCTTGGAGGCATTA                                   | 200                |
| YFV B3          | GTCCATCACAGTTGCCATCA                                   | 200                |
| YFV FIP Bump -8 | <u>GGCCTCCGATTGATCTCGGC</u> TTTT GATTACAAGGAGTGTGAGTGG | 1600               |
| YFV BIP         | <u>GGTTCAGACGAACGGACCTTGG</u> TTTT CCCTGGGCAAGCTTCTCT  | 1600               |
| YFV LoopF-Cy3   | Cy3-CTTCAACTGATGTTCCAATCGTATG                          | 800                |
| YFV LoopB       | ATGCAGGTACCACTAGAAGTGA                                 | 800                |
| YFV LFc-12-IBFQ | CATCAGTTGAAG-IBFQ                                      | 1200               |

**Supplementary Table S2:** Complete set of primers for modified DENV assay. Underlined sequences within the FIP and BIP primers reflect the F1c and B1c regions of those primers. The primers are based upon the publication by Lau *et al.* <sup>2</sup>

| Primer name           | Sequence                                              | Concentration (nM) |
|-----------------------|-------------------------------------------------------|--------------------|
| DENV1 F3              | TGGGGTAGCAGACTAGTGG                                   | 50                 |
| DENV1 B3              | TCTGTGCCTGGAATGATGC                                   | 50                 |
| DENV1 FIP             | <u>CCACCAGGGTACAGCTTCCC</u> GACCCCTCCCAAAACACAA       | 400                |
| DENV13 BIP-Cy5 Bump+2 | Cy5- <u>AGAGGTTAGAGGAGACCCCC</u> CAGGATCTCTGGTCTCTCCC | 800                |
| DENV1 LoopF           | TGGTGTGGGCCCCGCT                                      | 200                |
| DENV13 LoopB Bump+2   | AAACAGCATATTGACGCT                                    | 400                |
| DENV2 F3              | TACGCATGGCGTAGTGGA                                    | 50                 |
| DENV2 B3              | GCGTTCTGTGCCTGGAAT                                    | 50                 |
| DENV2 FIP Bump-4      | <u>TCATCTCACCTTGGGCCCCC</u> TAGCGTTAGAGGAGACC         | 400                |
| DENV24 BIP-Cy5        | Cy5- <u>AGAGGTTAGAGGAGACCCCC</u> GCAGGATCTCTGGTCTTTCC | 800                |
| DENV2 LoopF           | GTTGCTGCGATTTGTAA                                     | 200                |
| DENV2 LoopB           | ACAGCATATTGACGCTG                                     | 200                |
| DENV3 F3              | GCTGTACGCACGGTGTAG                                    | 50                 |
| DENV3 B3              | CCTGGAATGATGCTGAGGAG                                  | 50                 |
| DENV3 FIP             | <u>GGTACAGCTTCCCTCAGTGCTC</u> GTGGTTAGAGGAGACCCCT     | 400                |
| DENV3 LoopF           | CTGCTGCGTTGTGTCAT                                     | 200                |
| DENV3 LoopB           | CAGCATATTGACGCTGG                                     | 200                |
| DENV4 F3              | CGCGTGGCATATTGGACTA                                   | 50                 |
| DENV4 B3*             | TGCCTGGATTGATGTTGCA                                   | 50                 |
| DENV4 FIP Bump+3      | <u>CAGCTTCCTCCTGGCTTCG</u> GTTAGAGGAGACCCCTCCA        | 400                |
| DENV4 LoopF           | CCCCTTTTGCTGCGTTT                                     | 200                |
| DENV4 LoopB           | AAACAGCATATTGACGC                                     | 200                |
| DENV1234 BIPc-10      | TCTAACCTCT-IBRQ                                       | 2400               |

\*DENV4 B3 sequence reflects a correction described in a comment by the authors on the publisher's site for Lau *et al.* <sup>2</sup>.

**Supplementary Table S3:** Thermodynamic parameters for original and modified YFV, DENV2 and DENV4 FIP primers.

| FIP Primers    | Max $\Delta G$ (Perfect primer binding) (kJ/mol) | Total Hairpin Structures | Amplifiable Hairpin Structures | Total Dimer Structures | Amplifiable Dimer Structures |
|----------------|--------------------------------------------------|--------------------------|--------------------------------|------------------------|------------------------------|
| YFV Original   | -85.19                                           | 10                       | 4                              | 19                     | 1                            |
| YFV Modified   | -88.25                                           | 7                        | 0                              | 9                      | 1                            |
| DENV2 Original | -83.48                                           | 10                       | 7                              | 15                     | 4                            |
| DENV2 Modified | -81.46                                           | 6                        | 1                              | 12                     | 3                            |
| DENV4 Original | -83.06                                           | 16                       | 10                             | 14                     | 3                            |
| DENV4 Modified | -81.33                                           | 14                       | 0                              | 6                      | 1                            |

**Supplementary Table S4:** Comparison of performance for DENV primers (pan-serotype assay) either using originally reported primer sequences or a combined set using the modified DENV2 and DENV4 FIP, for replicate reactions at two concentrations for each serotype of DENV near the expected limit of detection.

| Target | copies | Original DENV primers |           | Modified DENV2 and DENV4 FIP |           |
|--------|--------|-----------------------|-----------|------------------------------|-----------|
|        |        | Number positive       | Mean time | Number positive              | Mean time |
| DENV1  | 200    | 10 / 10               | 24 ± 2    | 10 / 10                      | 22 ± 2    |
|        | 50     | 6 / 10                | 30 ± 8    | 9 / 10                       | 24 ± 3    |
| DENV2  | 200    | 8 / 10                | 31 ± 4    | 7 / 10                       | 30 ± 3    |
|        | 50     | 3 / 10                | 33 ± 5    | 1 / 10                       | 35        |
| DENV3  | 200    | 5 / 10                | 27 ± 3    | 4 / 10                       | 34 ± 8    |
|        | 50     | 2 / 10                | 31 ± 4    | 1 / 10                       | 45        |
| DENV4  | 200    | 10 / 10               | 29 ± 8    | 10 / 10                      | 22 ± 3    |
|        | 50     | 3 / 10                | 37 ± 5    | 6 / 10                       | 28 ± 8    |

**Supplementary Table S5:** Limits of detections with 50% and 90% probability, and corresponding confidence intervals for assay targets from the modified YFV and DENV assays. Detection limits are listed as copy number of viral genomic RNA input per 10- $\mu$ L assay. LOD and confidence intervals were determined from probit analysis, using BioStat software. N refers to the total number of replicates across all concentrations included in the probit analysis, excluding no-template control reactions.

| <b>Target</b> | <b>LOD<sub>50</sub></b> | <b>LOD<sub>50</sub> 95% confidence</b> | <b>LOD<sub>90</sub></b> | <b>LOD<sub>90</sub> 95% confidence</b> | <b>N total</b> |
|---------------|-------------------------|----------------------------------------|-------------------------|----------------------------------------|----------------|
| YFV RNA       | 170                     | 120 – 240                              | 910                     | 600 – 1700                             | 168            |
| DENV-1 RNA    | 8                       | 2 – 12                                 | 30                      | 20 – 80                                | 110            |
| DENV-2 RNA    | 60                      | 50 – 90                                | 160                     | 110 – 310                              | 110            |
| DENV-3 RNA    | 70                      | 40 – 100                               | 200                     | 120 – 570                              | 68             |
| DENV-4 RNA    | 50                      | 30 – 80                                | 190                     | 110 – 520                              | 68             |

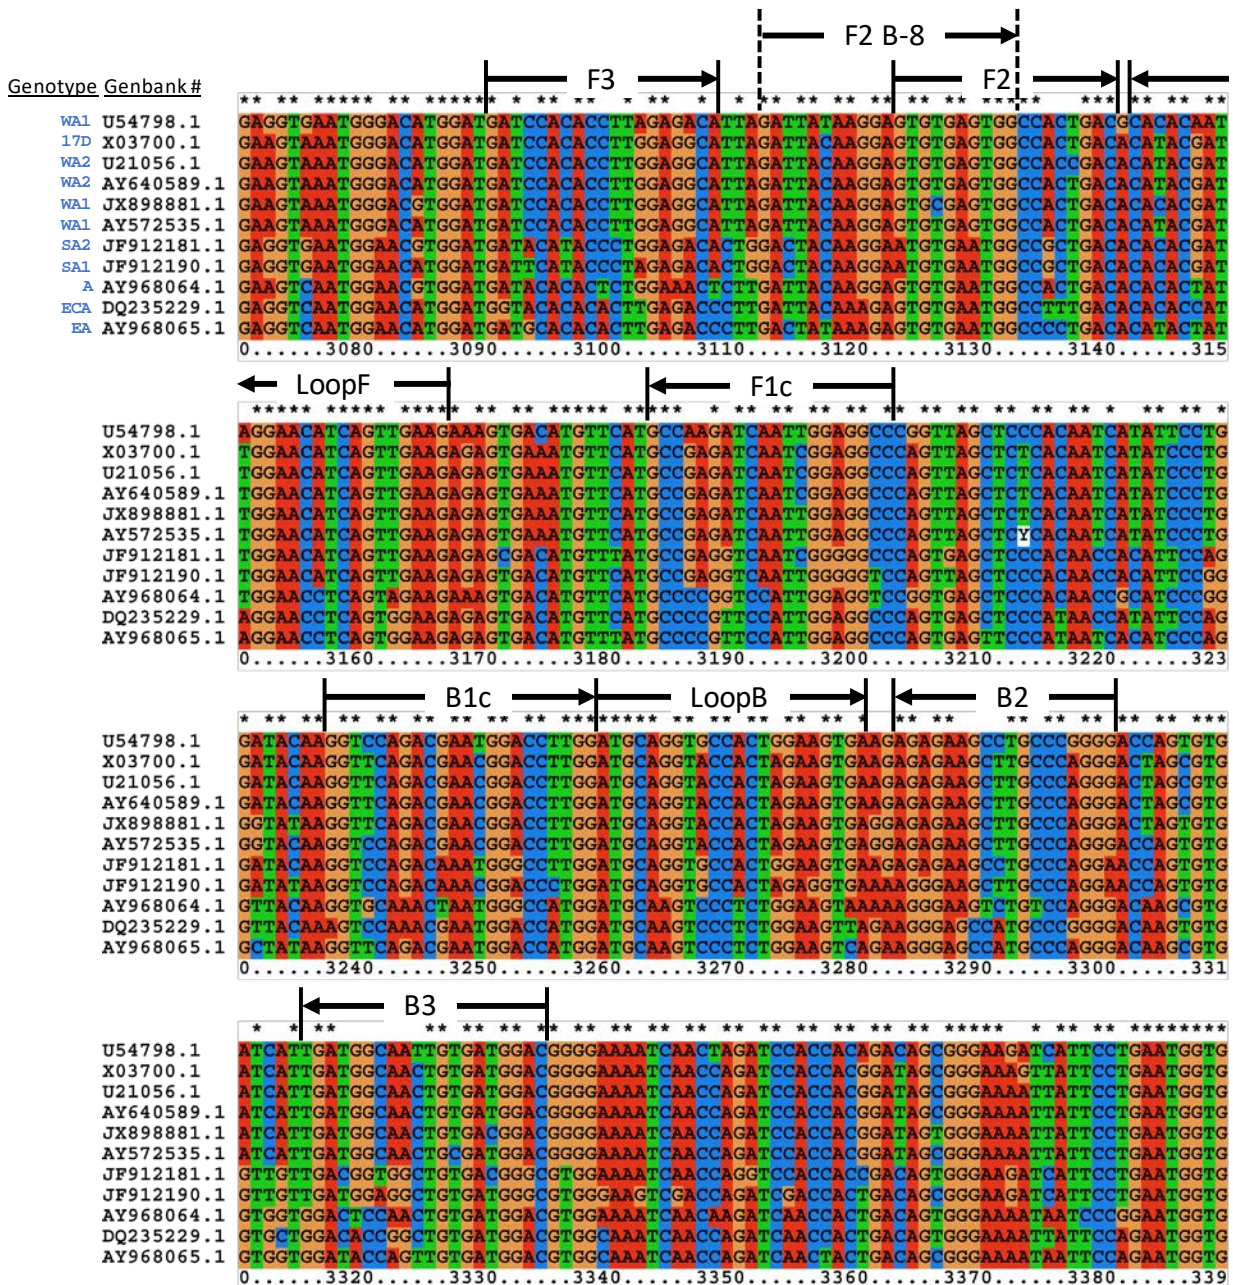

**Supplementary Figure S1:** YFV sequence alignment of a portion of the NS1 gene showing primer binding sites, including original and modified (bumped) F2 region of FIP. Note FIP and BIP primers have a “TTTT” linker between the F1c and F2 (or B1c and B2) regions. Genotypes are labeled as per Beasley *et al*<sup>3</sup>. WA1, WA2 = West Africa 1 & 2; 17D = 17D vaccine strain (likely West African origin), SA1, SA2 = South American 1 & 2; A = Angola; ECA = East-Central African; EA = East African.

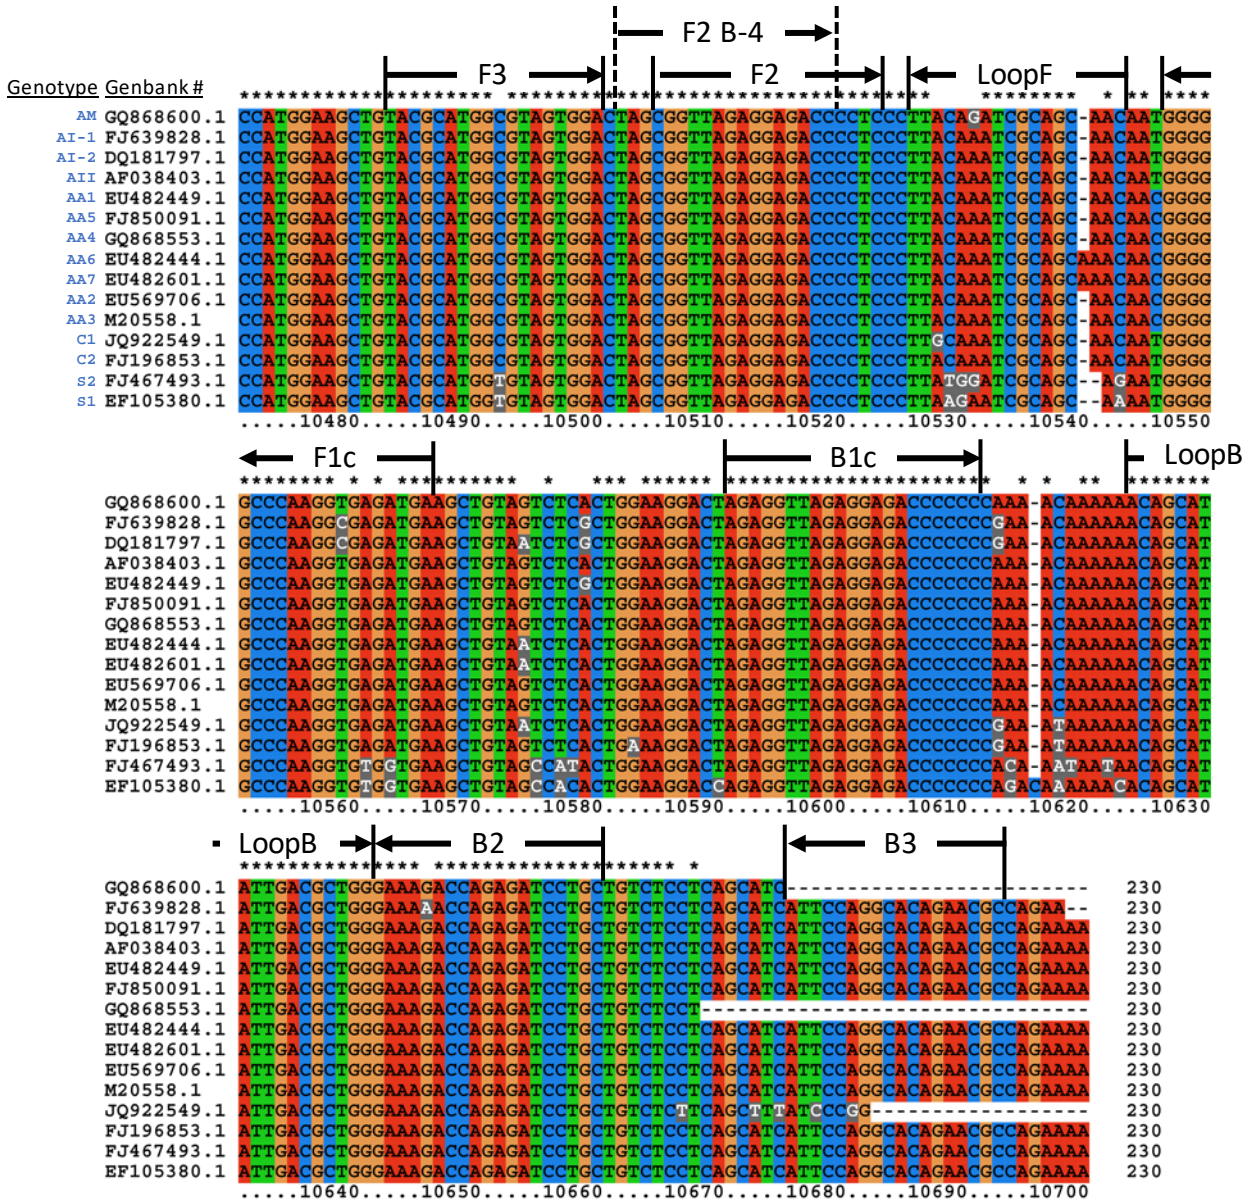

**Supplementary Figure S2:** DENV-2 sequence alignment of 3'-UTR region showing primer binding sites, including original and modified (bumped) F2 region of FIP. Genotypes and sub-genotypes are labeled as per Waman *et al*<sup>4</sup>. AM = American, AI-1, AI-2 = Asian I; AII = Asian II, AA1-AA7 = Asian-American; C1, C2 = Cosmopolitan; S2, S2 = Sylvatic



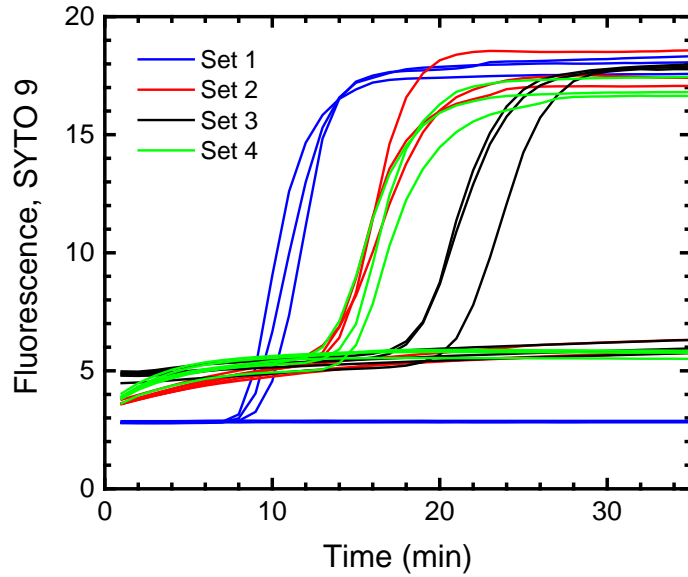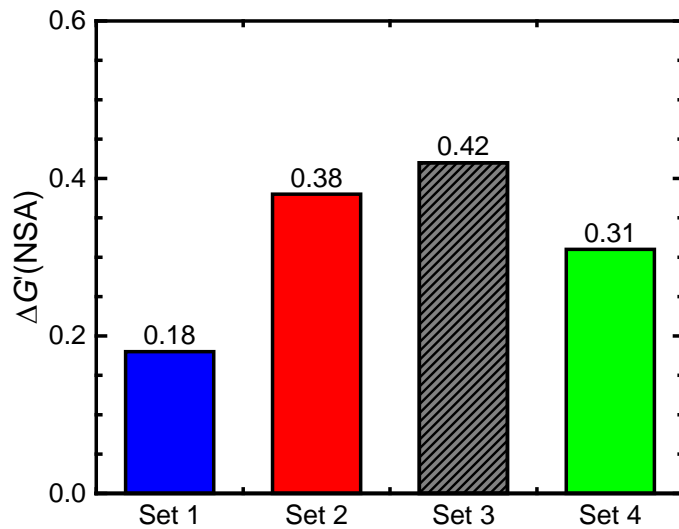

**Supplementary Figure S3:** Real-time amplification curves (top) and probability of non-specific amplification ( $\Delta G'(\text{NSA})$ , bottom), calculated for 4 candidate primer sets evaluated for an Ebola RT-LAMP assay (unpublished). The real-time curves at top illustrate 3 positive controls and 3 no-template controls for each primer set. The  $\Delta G'(\text{NSA})$  at bottom are calculated for the entire primer set.

## References (also cited in main text)

1. A. Kwallah, S. Inoue, A. W. Muigai, T. Kubo, R. Sang, K. Morita and M. Mwau, *J Virol Methods*, 2013, **193**, 23-27.
2. Y.-L. Lau, M.-Y. Lai, B.-T. Teoh, J. Abd-Jamil, J. Johari, S.-S. Sam, K.-K. Tan and S. AbuBakar, *PLOS ONE*, 2015, **10**, e0138694.
3. D. W. Beasley, A. J. McAuley and D. A. Bente, *Antiviral research*, 2015, **115**, 48-70.
4. V. P. Waman, P. Kolekar, M. R. Ramtirthkar, M. M. Kale and U. Kulkarni-Kale, *PeerJ*, 2016, **4**, e2326.
